# Supplementary material for: A high-throughput microfluidic platform for functional hiPSC-derived liver organoids with bile duct- and lobule-like structures
Source: Royal Society of Chemistry journal article supplement (doi:10.1039/d5lc00154d), 2025-01-01
Supplement: d5lc00154d1.pdf [file d5lc00154d1.pdf]

## Supporting Information

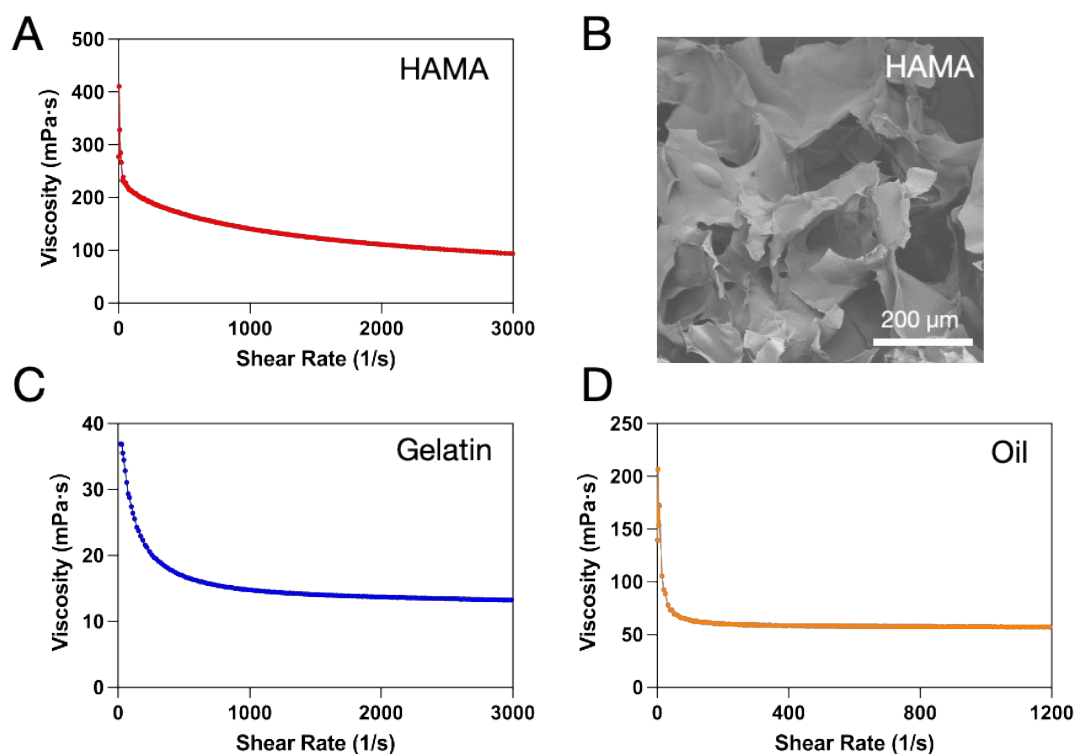

**Figure S1. Physical properties of the materials used in HCSM fabrication.** (A) Strain yielding properties of HAMA. (B) SEM picture of HAMA. (C-D) Strain yielding properties of Gelatin and Oil.

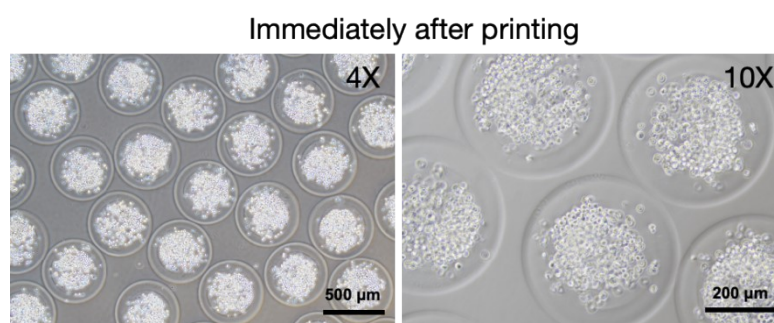

**Figure S2. Bright-field images of hiPSCs evenly distributed in HCSM immediately after printing.**

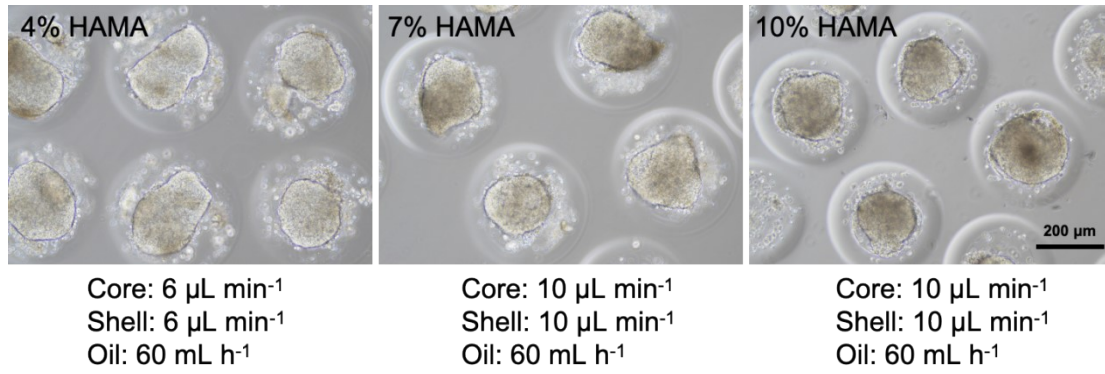

**Figure S3. Bright-field images of hiPSCs self-assembled into spheroids within different HCSM.**

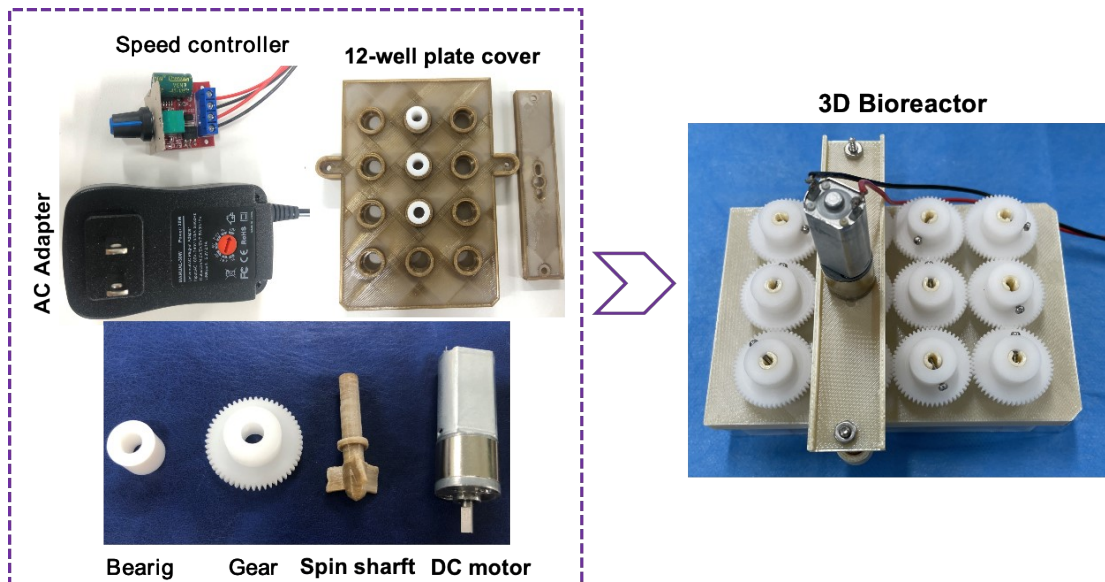

**Figure S4. Real images of the stirring speed controllable 3D bioreactor and its main components.**

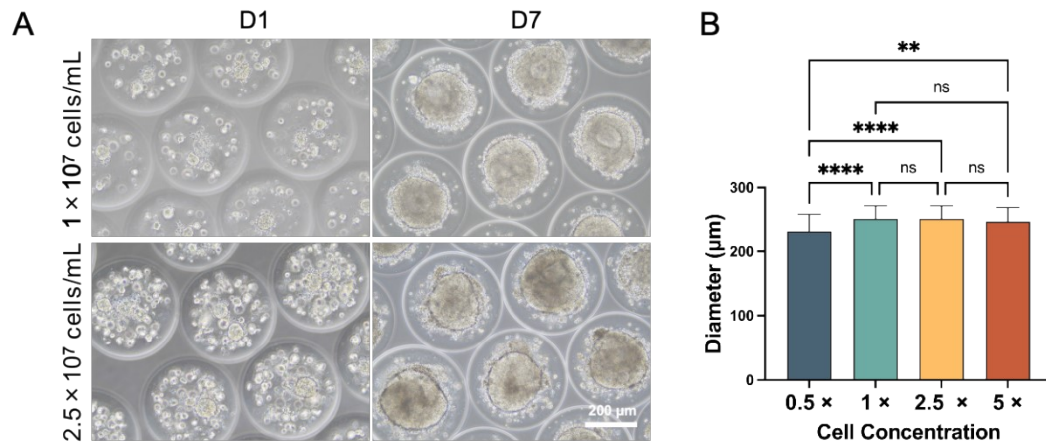

**Figure S5. Formation of hiPSC spheroids at different cell printing concentrations.** (A) Bright-field images of hiPSC spheroids formed at different cell printing concentrations in static culture. (B) Comparison of the diameters of hiPSC spheroids formed at different printing concentrations on day 7 of static culture. All data were presented as the mean  $\pm$  SD ( $n = 3$ ). \*\* $p < 0.01$ , \*\*\*\* $p < 0.0001$ , ns denoted no significance.

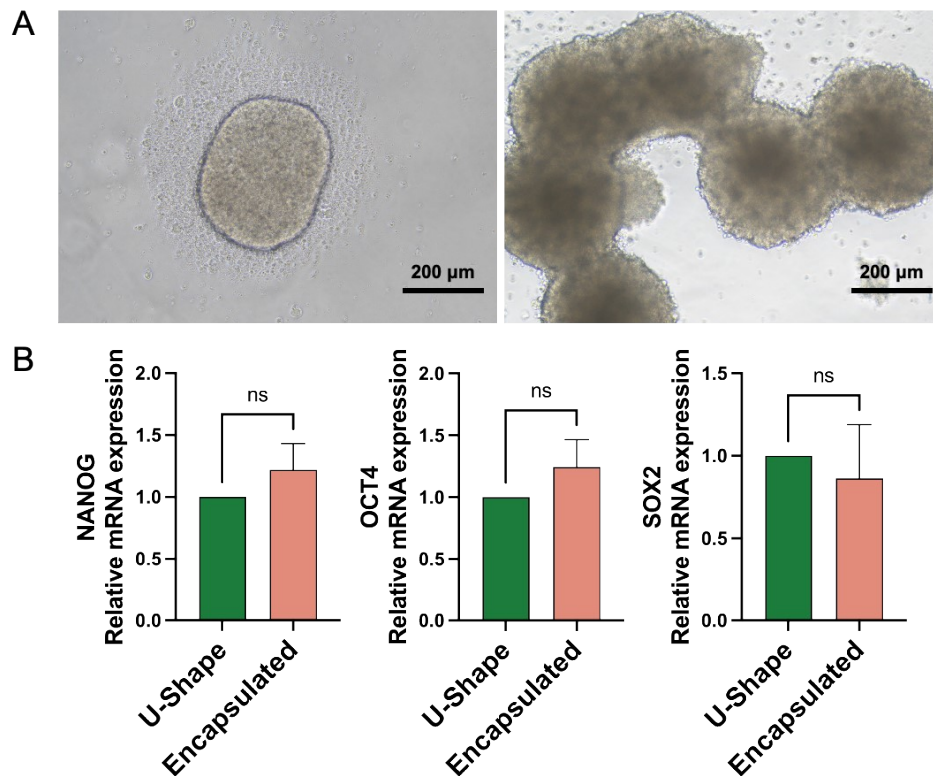

**Figure S6. Characterization of hiPSC spheroids cultured in U-shaped 96-well plates.** (A) Bright-field images of hiPSC spheroids, in U-shaped 96-well plates (left); fused spheroids (right). (B) Pluripotent gene expression of hiPSCs cultured in U-shaped 96-well plates and encapsulated in HCSM. All data were presented as the mean  $\pm$  SD ( $n = 3$ ). Ns denoted no significance.

**Video S1:** At an oil flow rate of 60 mL h<sup>-1</sup>, approximately 240 microspheres were generated per minute on this platform. (Video S1 is provided in a separate file in the Supporting Information)

**Video S2:** Live imaging of hiPSCs at 24 h post-encapsulated in HCSM under microscope. (Video S2 is provided in a separate file in the Supporting Information).

**Video S3:** Video of the 3D bioreactor being stirred at different speeds. (Video S3 is provided in a separate file in the Supporting Information)

**Video S4:** Live imaging of uniformly sized hiPSC spheroids at 5 d post-encapsulated in HCSM under microscope.(Video S4 is provided in a separate file in the Supporting Information)

**Video S5:** Live imaging of beating cardiac organoid derived from hiPSCs at D27 of differentiation in HCSM under microscope. (Video S5 is provided in a separate file in the Supporting Information)

**Video S6:** Live imaging of beating cardiac organoid at D10 with Fluo-4 staining under fluorescence microscope. (Video S6 is provided in a separate file in the Supporting Information)

Table S1: List of primers used for RT-PCR analysis.

| Gene   | Forward                  | Reverse                  |
|--------|--------------------------|--------------------------|
| GADPH  | TGTTGCCATCAATGACCCCTT    | CTCCACGACGTACTCAGCG      |
| NANOG  | CCGGTCAAGAAACAGAAGACCAGA | CCATTGCTATTCTTCGGCCAGTTG |
| OCT4   | GATCACCTGGGATATACAC      | GCTTTCATATCTCCTGAAG      |
| SOX2   | TCAGGAGTTGTCAAGGCAGAGAAG | GCCGCCCGCATATTGTTATTAT   |
| SOX17  | GGCGCAGCAGAATCCAGA       | CCACGACTTGCCAGCAT        |
| AFP    | AGTGAGGACAACTATTGGCCT    | ACACCAGGGTTTACTGGAGTC    |
| ALB    | GAGACCAGAGGTTGATGTGATG   | AGTTCCGGGGCATAAAAGTAAG   |
| CK19   | ACCAAGTTTGAGACGGAACAG    | CCCTCAGCGTACTGATTCCT     |
| CYP3A4 | TCATTGCTGTCTCAACCTTCACC  | GCTTCCCGCCTCAGATTTCTCAC  |
| CYP2C9 | GAGGAGCATTGAGGACCGTGTC   | GGAGCACAGCCCAGGATGAAAG   |

Table S2: List of primary antibodies used in immunofluorescence staining.

| Antigen | Host species | Supplier | Cat number | Dilution |
|---------|--------------|----------|------------|----------|
| NANOG   | Rabbit       | abcam    | ab109250   | 1:250    |
| OCT4    | Mouse        | abcam    | ab184665   | 1:250    |
| SOX2    | Rabbit       | abcam    | ab97959    | 1:500    |
| Nestin  | Mouse        | abcam    | ab22035    | 1:500    |
| ACTN2   | Mouse        | abcam    | ab9465     | 1:500    |

|            |        |                          |           |       |
|------------|--------|--------------------------|-----------|-------|
| TNNI       | Mouse  | Santa Cruz Biotechnology | sc-365446 | 1:250 |
| CYP3A4     | Mouse  | Santa Cruz Biotechnology | sc-393860 | 1:250 |
| CK19       | Rabbit | abcam                    | ab76539   | 1:500 |
| ALB        | Goat   | Bethyl                   | A80-129A  | 1:250 |
| VIM        | Rabbit | MCE                      | HY-P80371 | 1:500 |
| E-cadherin | Mouse  | abcam                    | ab231303  | 1:500 |
| ZO-1       | Rabbit | abcam                    | ab307799  | 1:500 |
| F-Actin    |        | Beyotime                 | C2205S    | 1:200 |
